# Supplementary material for: Single-crystalline bismuth sulfide microrods for efficient visible light photodetection
Source: Royal Society of Chemistry journal article supplement (doi:10.1039/d4ta07352e), 2024-12-17
Supplement: d4ta07352e1.pdf [file d4ta07352e1.pdf]

# Supporting Information

## Single-Crystalline Bismuth Sulfide Microrods for Efficient Visible Light Photodetection

Ao Zeng <sup>a,†</sup>, Rawaid Ali <sup>a,†</sup>, Shili Fu <sup>a,†</sup>, Lei Liu <sup>a</sup>, Asif Rasool <sup>b</sup>, Chaoping Liu <sup>c</sup>,

Jiaxiu Man <sup>a,d\*</sup>, Xiaolu Zheng <sup>a,d</sup>, Hong-En Wang <sup>a,d\*</sup>

<sup>a</sup> College of Physics and Electronic Information, Yunnan Normal University, Kunming, 650500, China. Email: [manjiaxiu@ynnu.edu.cn](mailto:manjiaxiu@ynnu.edu.cn), [hongen.wang@ynnu.edu.cn](mailto:hongen.wang@ynnu.edu.cn)

<sup>b</sup> Department of Applied Sciences, Maulana Mukhtar Ahmad Nadvi Technical Campus (MMANTC), Malegoan 423203, India.

<sup>c</sup> Department of Physics, Shantou University, Shantou, Guangdong 515063, China.

<sup>d</sup> Yunnan Key Laboratory of Optoelectronic Information Technology, Yunnan Normal University, Kunming, 650500, China. Email: [hongen.wang@outlook.com](mailto:hongen.wang@outlook.com)

<sup>†</sup> These authors contributed equally to this work.

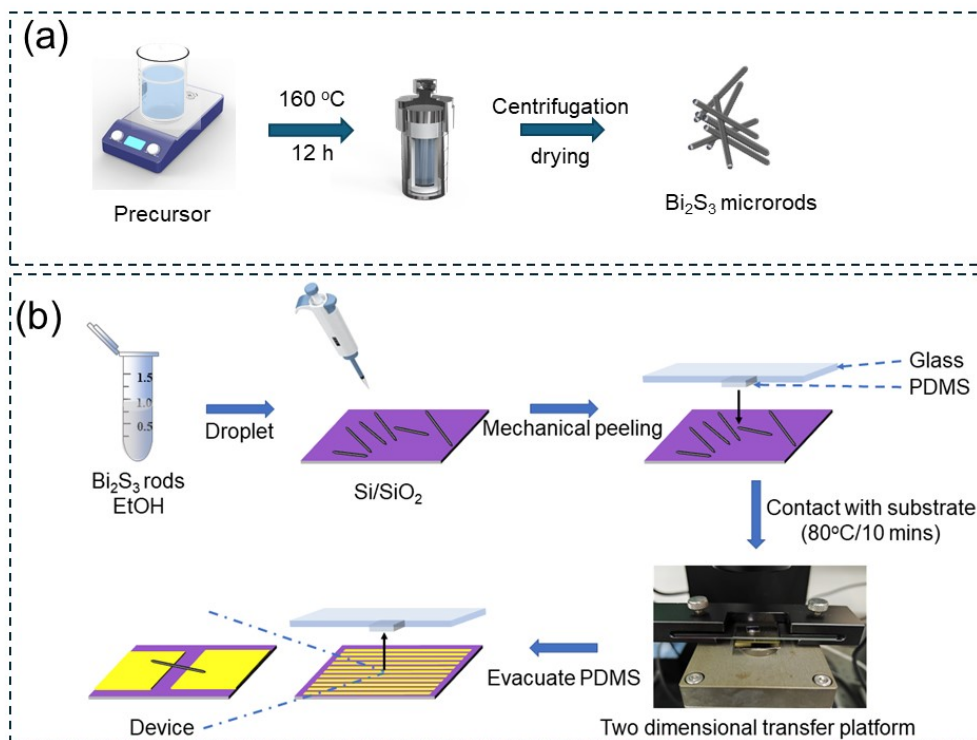

**Figure S1.** Schemes of the synthesis procedure of  $\text{Bi}_2\text{S}_3$  microrods (a) and (b) the fabrication process of the individual  $\text{Bi}_2\text{S}_3$  microrod-based photodetector device.

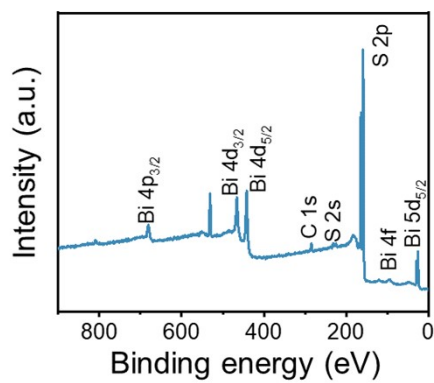

**Figure S2.** Survey XPS spectrum of  $\text{Bi}_2\text{S}_3$  sample.

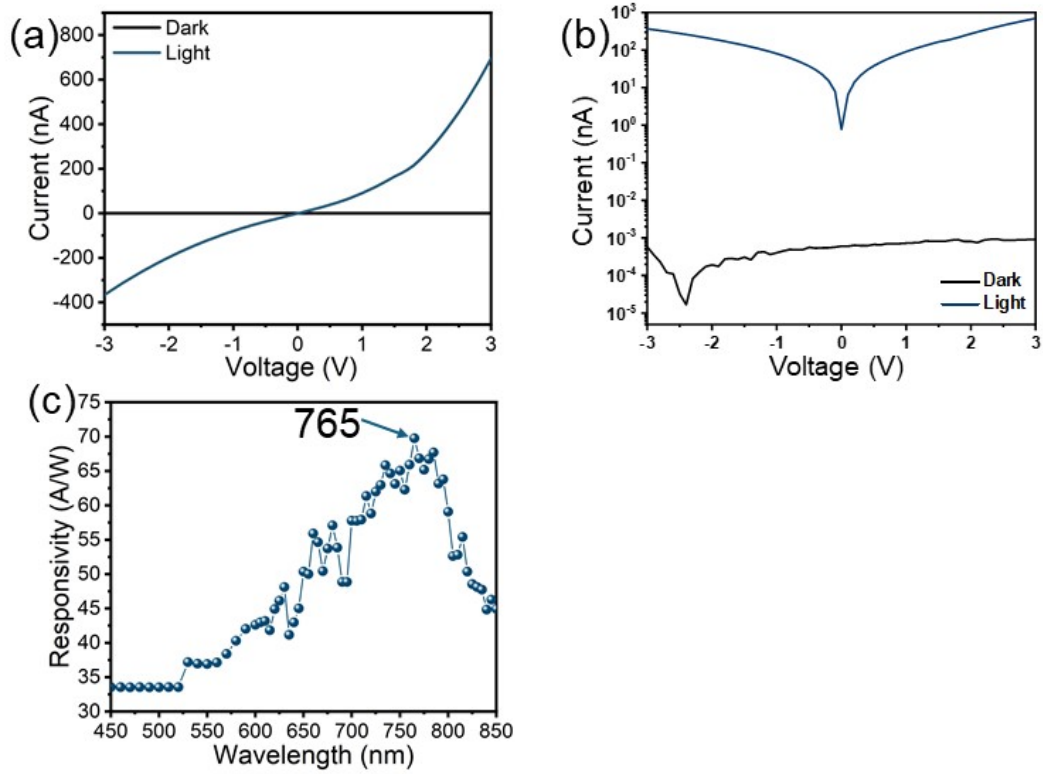

**Figure S3.** (a) Current-voltage (I-V) curve of the  $\text{Bi}_2\text{S}_3$  microrod device tested under dark and natural composite light, respectively. (b) logarithmic Y-axis curve of (a). (c) Responsivity curve of the  $\text{Bi}_2\text{S}_3$  microrod device measured under monochromatic light illumination, covering a spectral range from 450 to 850 nm, at a constant light power density of  $10 \mu\text{W}/\text{cm}^2$ .
